# Supplementary material for: Controllably realizing elastic/plastic bending based on a room-temperature phosphorescent waveguiding organic crystal
Source: Royal Society of Chemistry journal article supplement (doi:10.1039/c8sc03135e), 2018-10-02
Supplement: c8sc03135e1.pdf [file c8sc03135e1.pdf]

# **Controllably Realizing Elastic/Plastic Bending based on a Room Temperature Phosphorescent Waveguiding Organic Crystal**

Hao Liu, Zhengyi Bian, Qinyu Cheng, Linfeng Lan, Yue Wang and Hongyu Zhang\*

*\* State Key Laboratory of Supramolecular Structure and Materials, College of Chemistry, Jilin University,  
Qianjin Street, Changchun (P. R. China). E-mail: hongyuzhang@jlu.edu.cn*

## General Information

Emission spectrum was measured by a Fluoromax-4 spectrometer. Phosphorescent lifetime was measured by an Edinburgh FLS920 spectrometer. The crystal was irradiated by a Nd:YAG (355 nm) laser with a repetition rate of 10 Hz and the emission spectra of crystal ends were measured by a Maya2000 Pro CCD spectrometer. The crystal structure has been measured again. The lattice parameters ( $a = 6.005(9) \text{ \AA}$ ,  $b = 25.999(3) \text{ \AA}$ ,  $c = 4.0357(5) \text{ \AA}$ ,  $\alpha = 90^\circ$ ,  $\beta = 90^\circ$ ,  $\gamma = 90^\circ$ ) are consistent with the previous result (CCDC 707769:  $a = 5.9307(12) \text{ \AA}$ ,  $b = 26.138(6) \text{ \AA}$ ,  $c = 3.9251(8) \text{ \AA}$ ,  $\alpha = 90^\circ$ ,  $\beta = 90^\circ$ ,  $\gamma = 90^\circ$ ).<sup>1</sup>

## Bending Strain Formula

The bending of organic crystals could be regarded as a pure bending process without any shear components. Thus, bending strain is calculated using the Euler-Bernoulli equation.<sup>2</sup>

$$\varepsilon (\%) = y/R \times 100 \quad (1)$$

$y$  is the distance of the considered plane from the neutral plane whose length remains invariant under bending process, and  $R$  is the radius of curvature of the neutral plane. Thus, the maximum bending strains reflect on the outlayer and baselayer of crystals.

The crystal with a thickness  $t$ , the formula (1) equals to:

$$\varepsilon (\%) = t/(2R+t) \times 100 \quad (2)$$

To simplify this computational procedure, the value of  $R$  was fixed by a ballpoint pen refill with a radius of 2.25 mm. Thus, the bending strains are only dependent on the thickness of crystals.

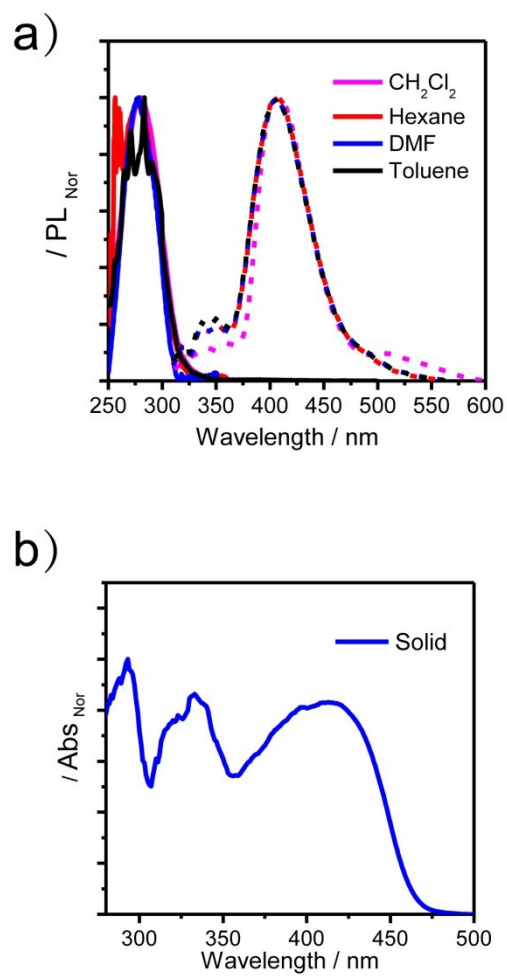

**Figure S1.** Absorption and emission spectra of **DBBZL** in different solvents (a), and absorption spectrum of crystals **DBBZL** (b).

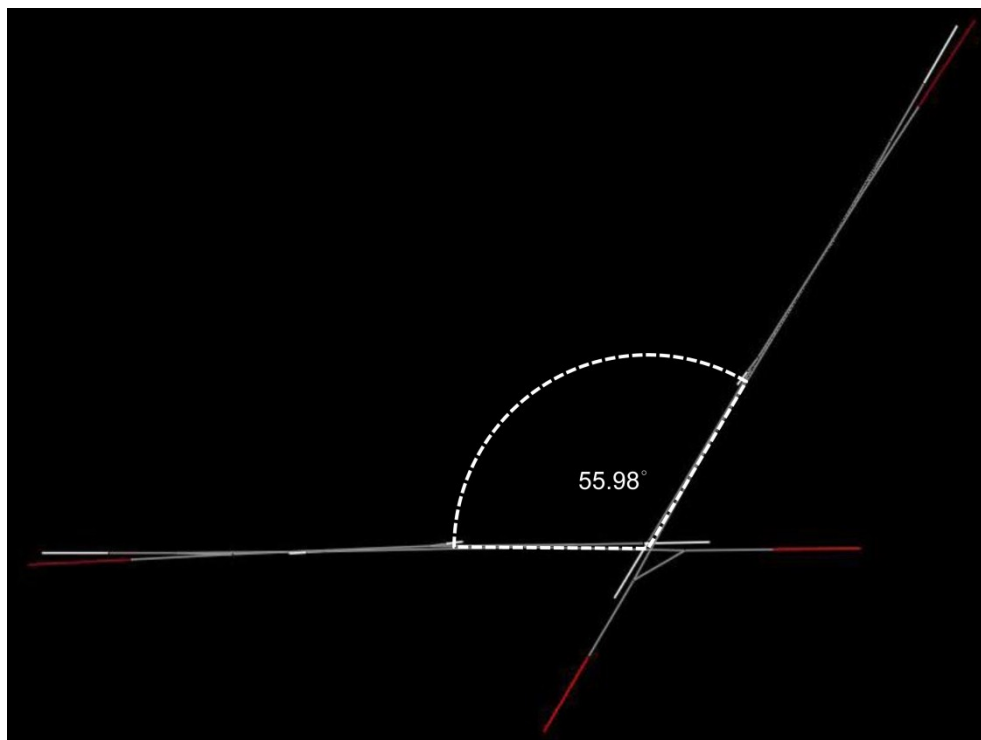

**Figure S2.** Twist conformation of molecule **DBBZL**. The angle between two benzene rings is given.

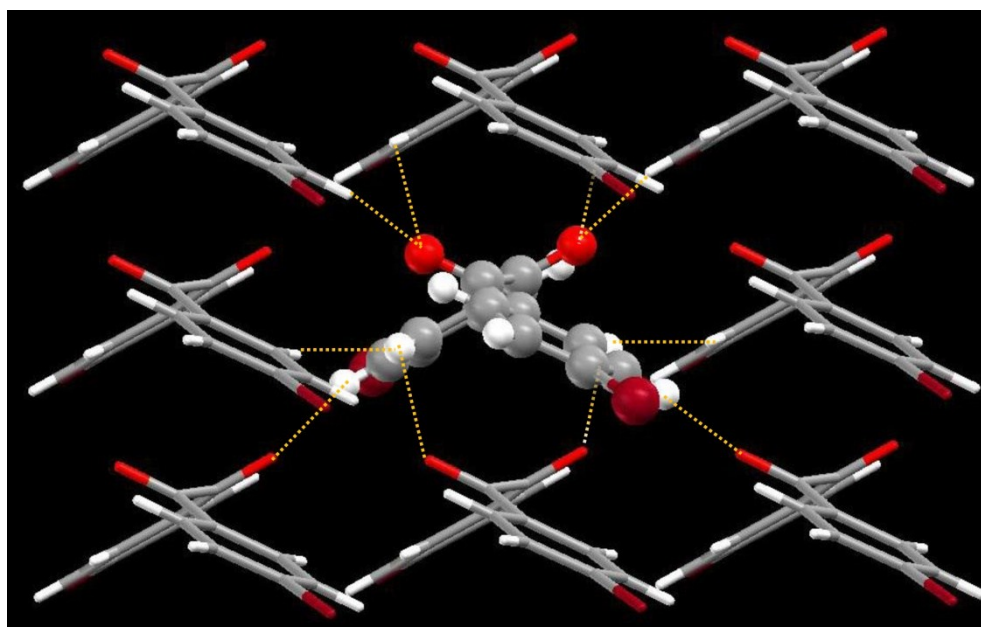

**Figure S3.** Interactions connected one molecule **DBBZL** with other molecules.

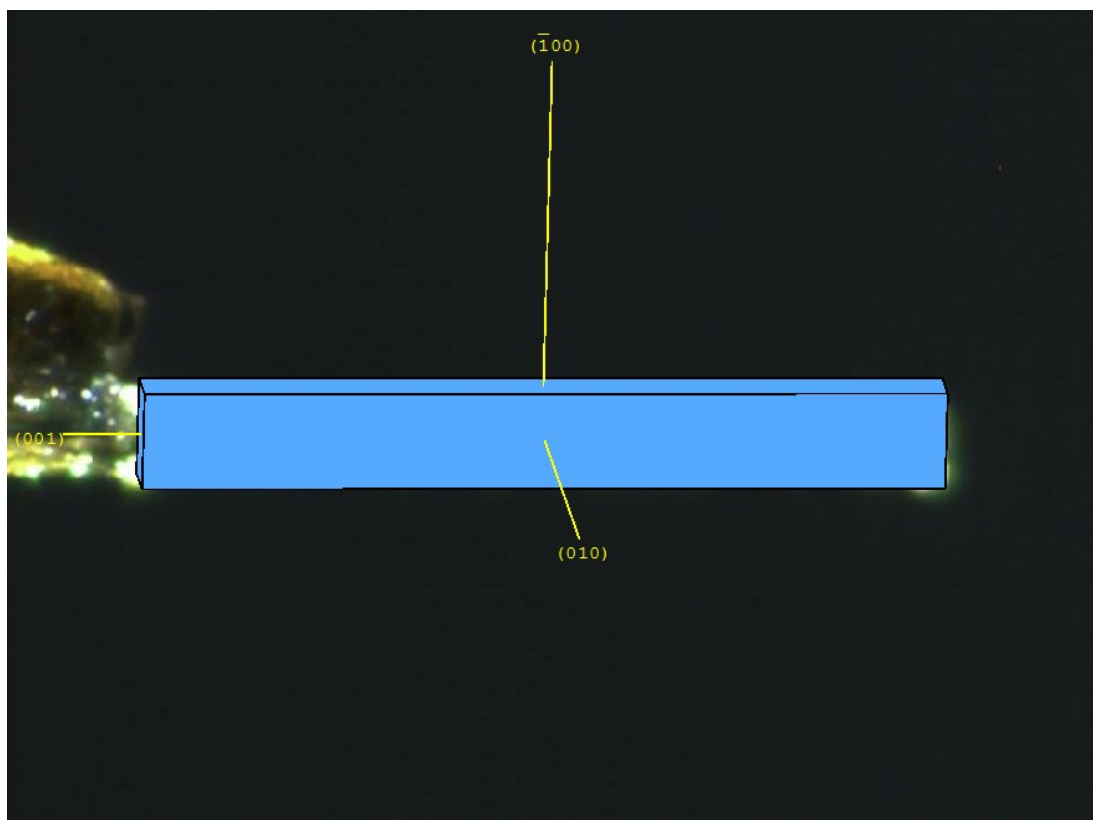

**Figure S4.** Determination of bending plane by X-ray diffraction.

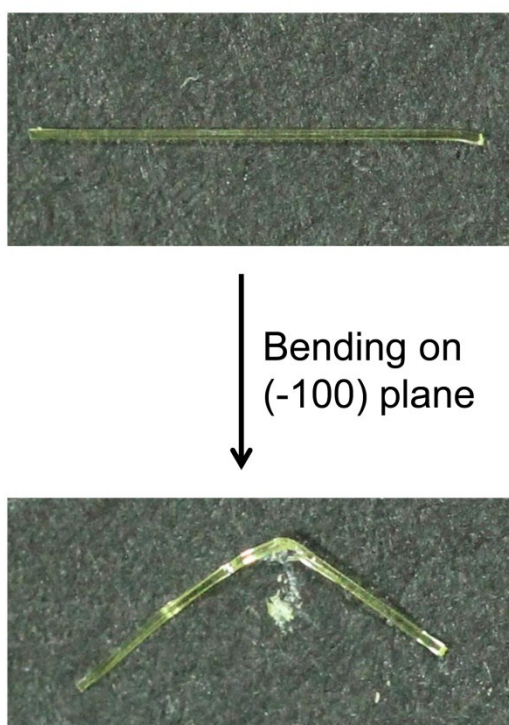

**Figure S5.** The bending process which occurred on  $(-100)$  plane.

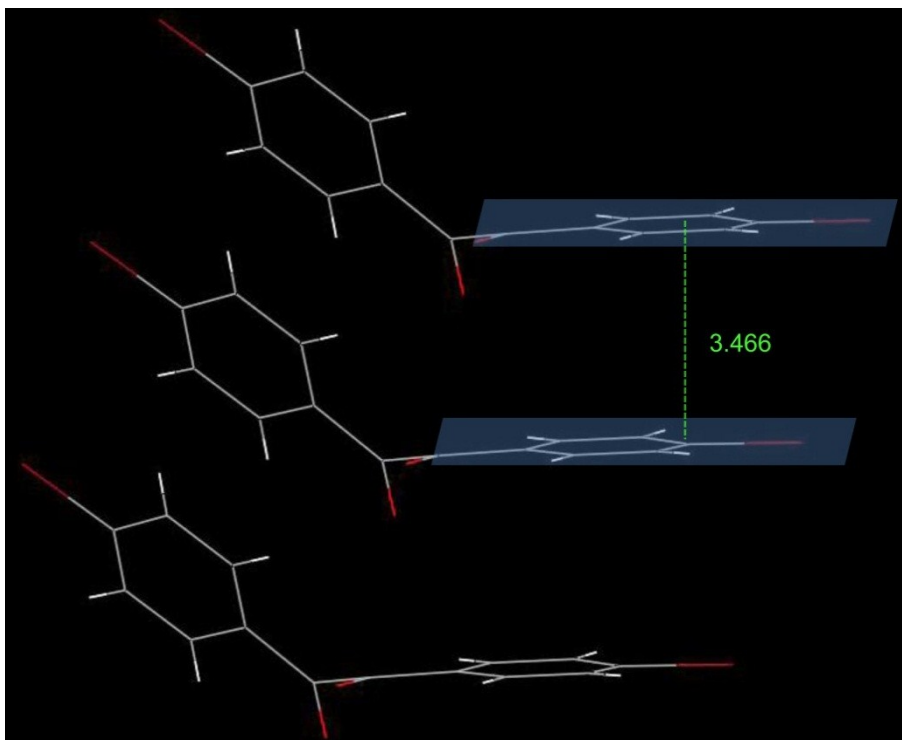

**Figure S6.** Distance between the parallel benzene rings.

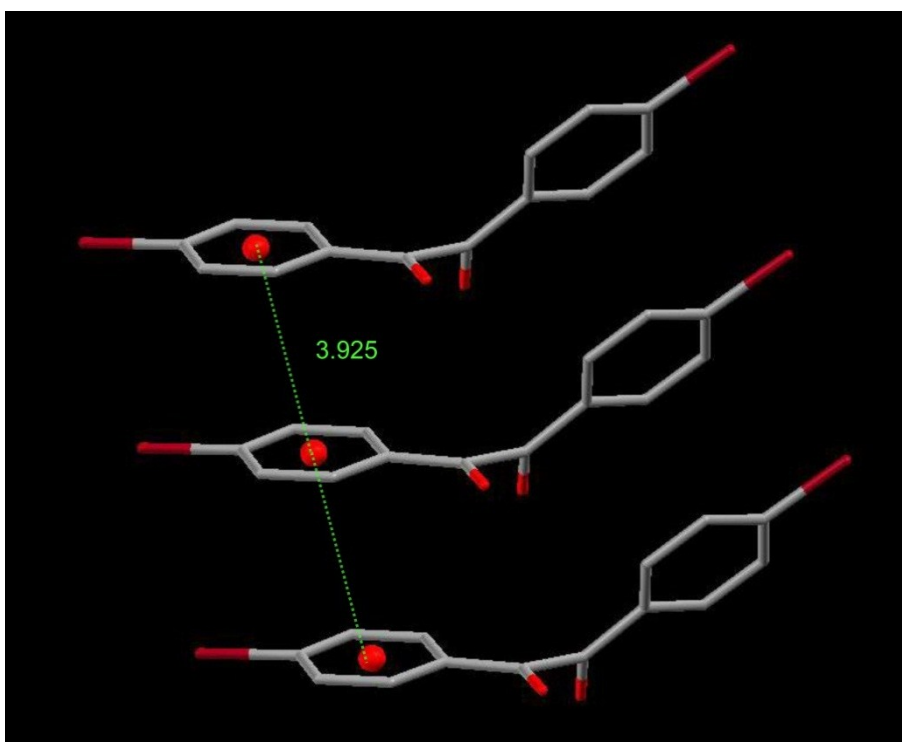

**Figure S7.** Distance between the centroids of benzene rings.

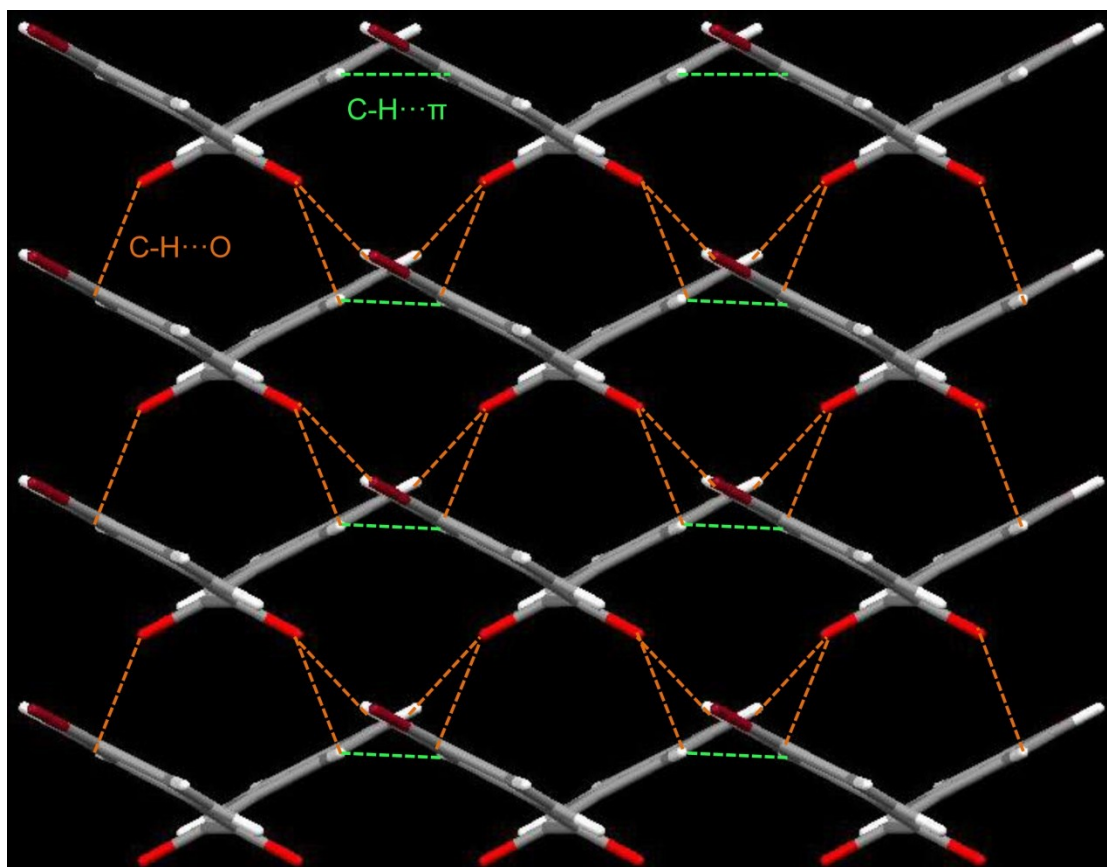

**Figure S8.** Crystal structure viewed down the major bending face (010), the orange lines represent C-H...O interactions and the green lines represent C-H...π interactions.

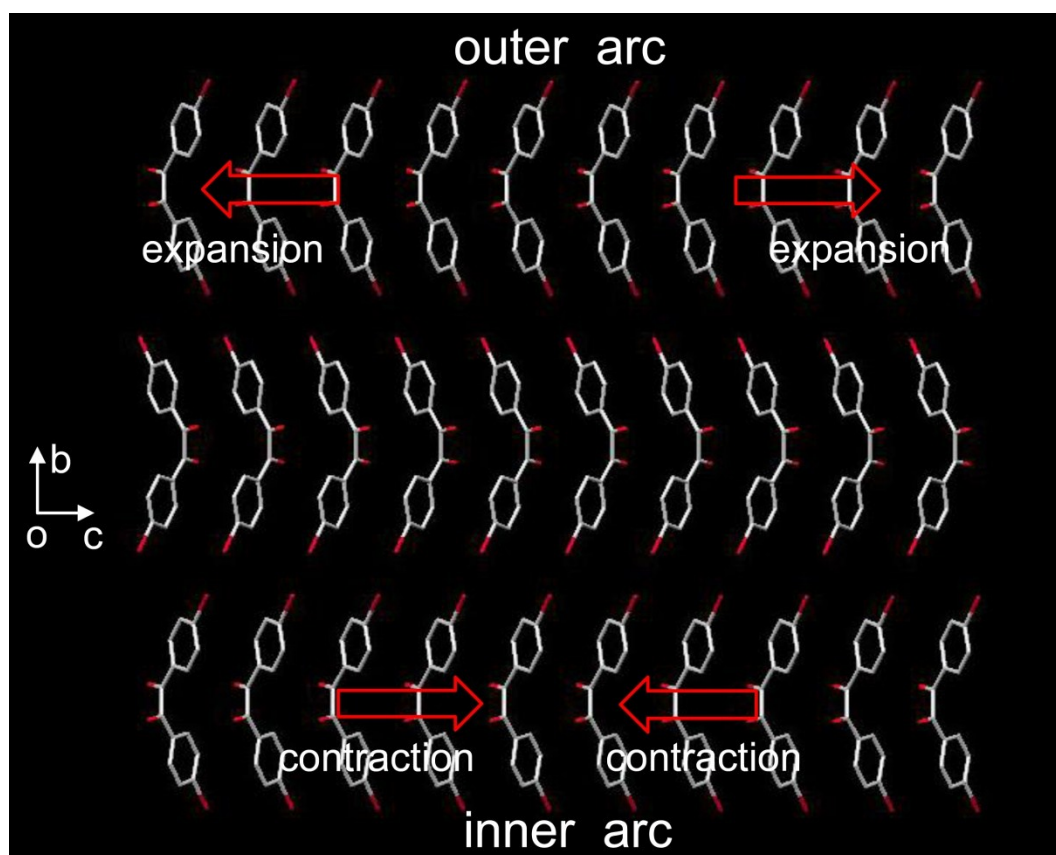

**Figure S9.** Molecular packing structure viewed down the (-100) plane along the b axis.

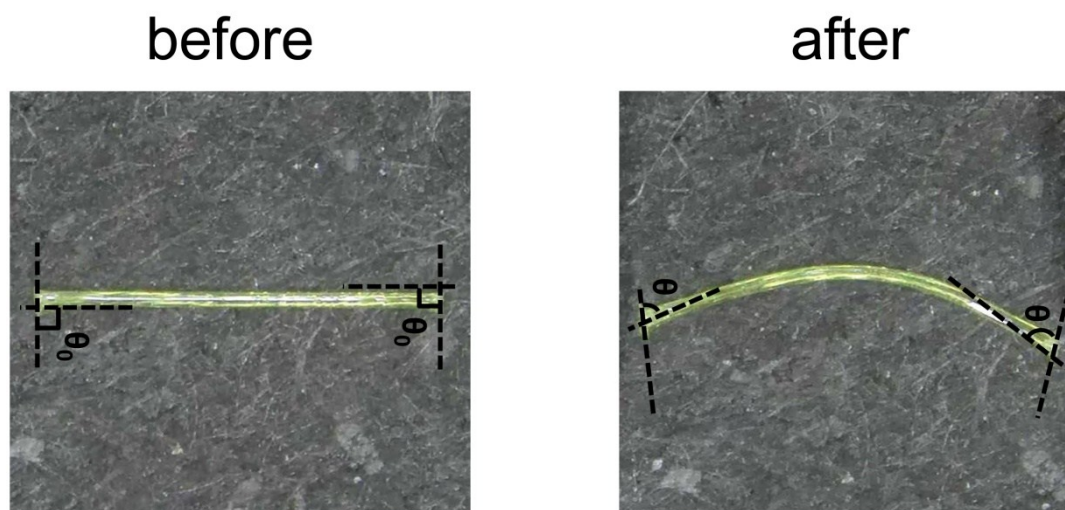

**Figure S10.** Photographs of the plastic bending process (the black dash lines represent the ends of crystal tops and bending faces;  $\theta_0$  and  $\theta$  represent the angles before bending and after bending).



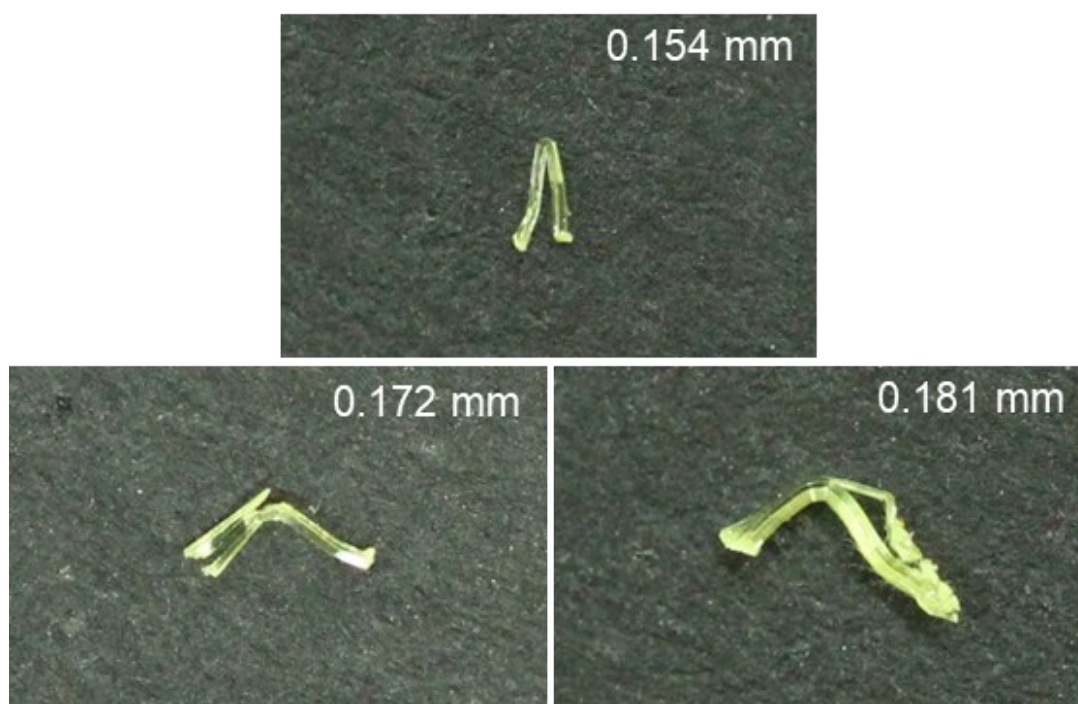

**Figure S11.** Photographs of the plastic bending of DBBZL crystals with various thicknesses (the thickness of each crystal is marked in the figure).

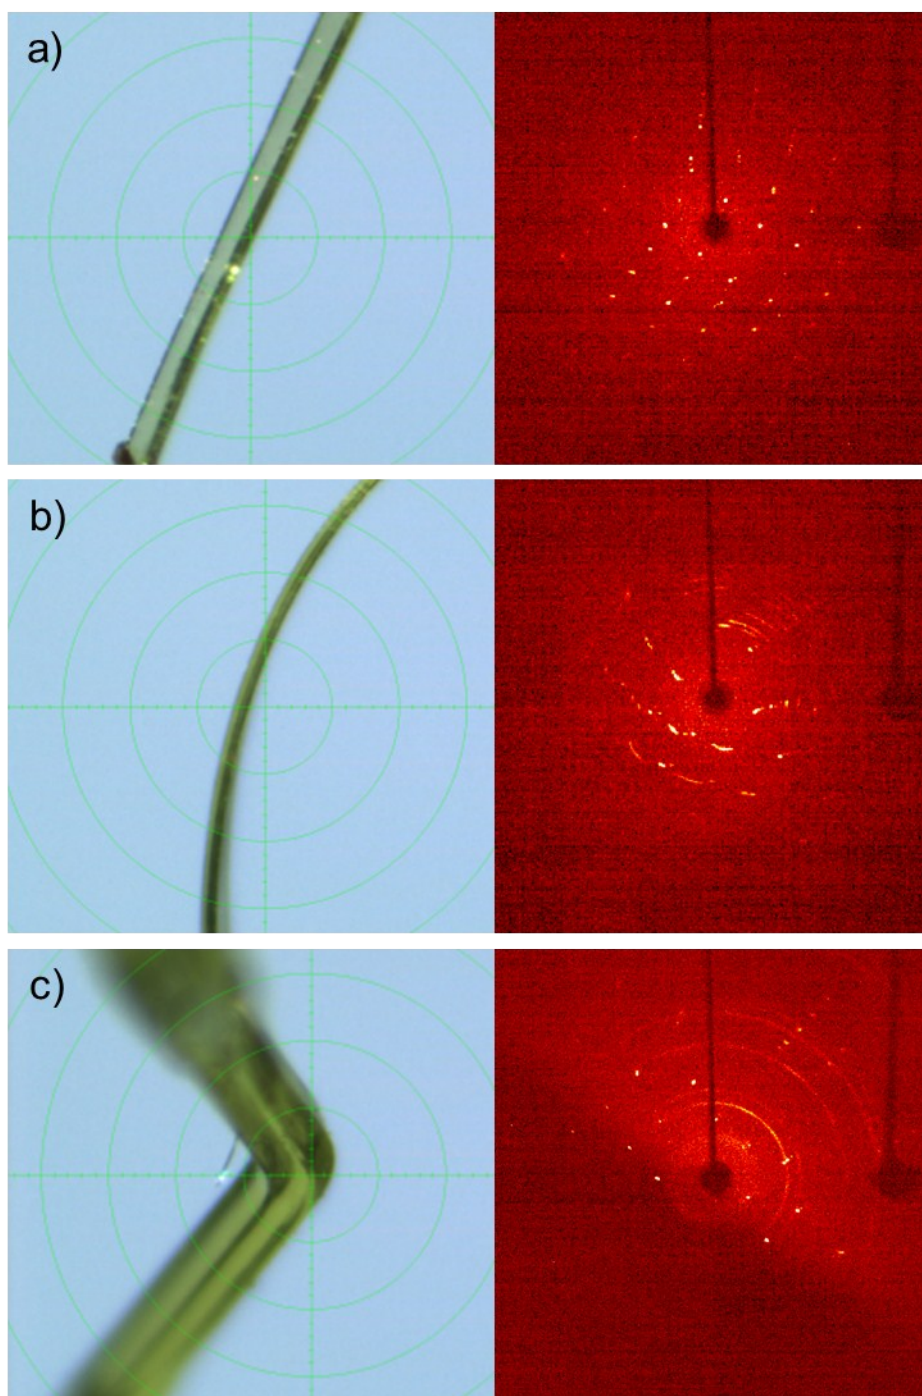

**Figure S12.** X-ray diffraction patterns of **DBBZL** crystals: a) straight crystal, b) elastically bended crystal, c) plastically bended crystal.

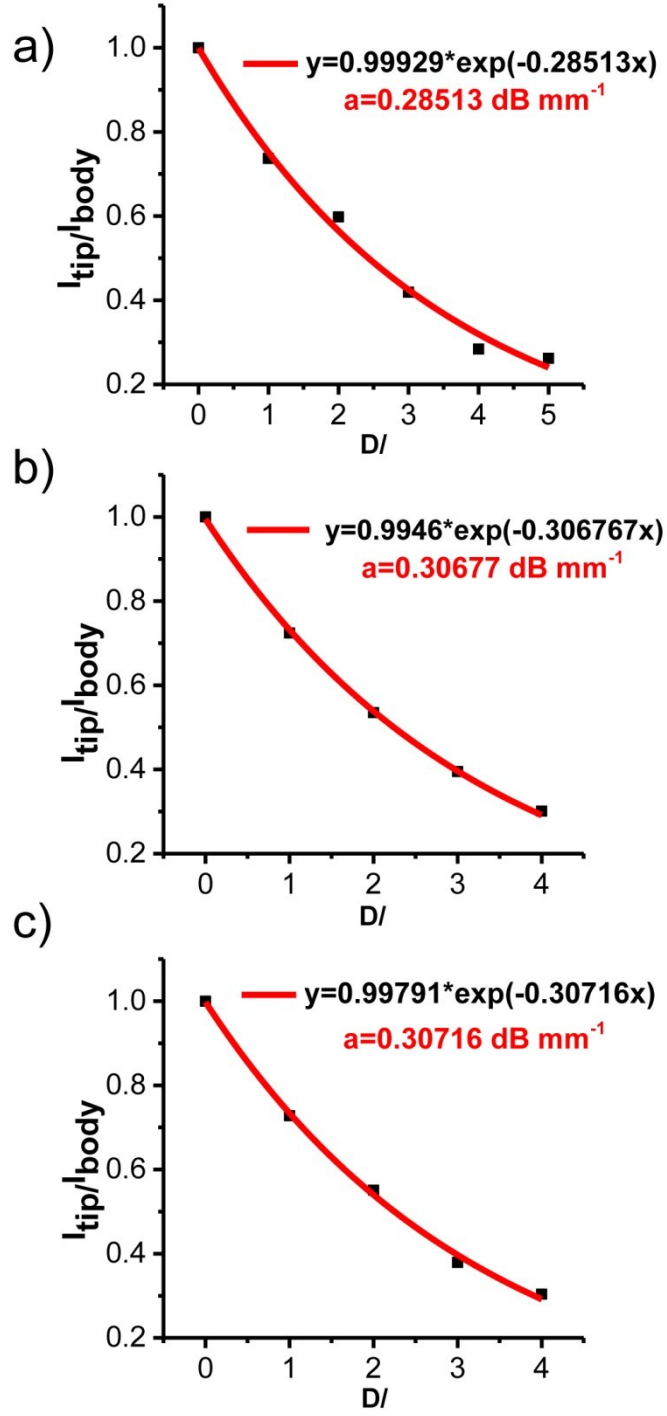

**Figure S13.** The  $I_{\text{tip}}/I_{\text{body}}$  decays of single DBBZL crystals in the straight state (a), elastic bent state (b) and plastic bent state (c).

## References

1. T. Kawasaki, Y. Harada, K. Suzuki, T. Tobita, N. Florini, G. Pályi and K. Soai, *Org Lett*, **2008**, *10*, 4085.
2. S. Timoshenko, *Strength of materials*, D. Van Nostrand Company, New York, **1940**.
